# Supplementary material
Source: Springer Nature journal article supplement (https://www.springermedizin.de/resource/supplementary/13002_2011_240_MOESM3_ESM.pdf/9627450)

**(A) USE VALUE**

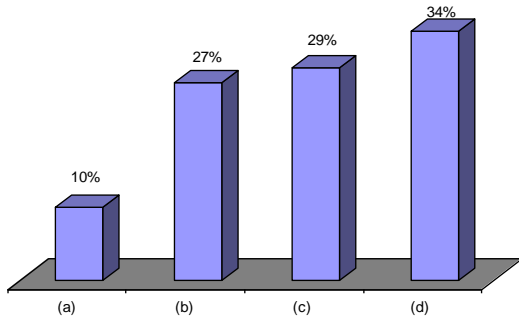

**(B) TASTE PREFERENCE**

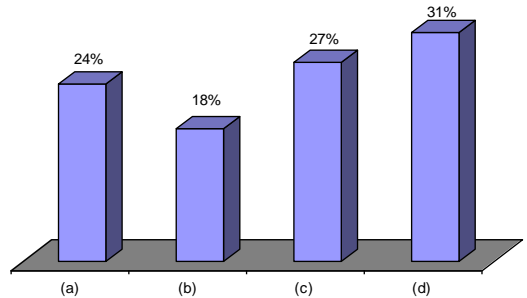

**(C) AVAILABILITY STATUS**

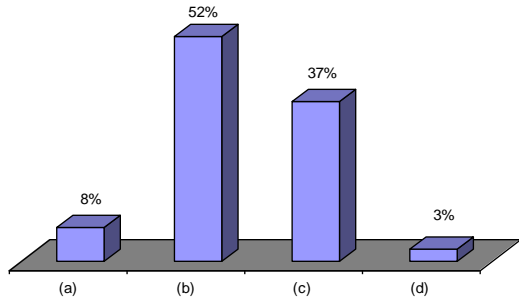

**(D) CONSERVATION STATUS**

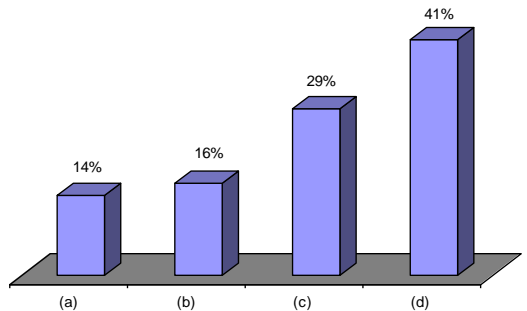

Supplement: MOESM3 [file 9627450]
